# Supplementary material for: Prediction of Tumor Recurrence and Therapy Monitoring Using Ultrasound-Guided Photoacoustic Imaging
Source: PubMed Central journal article supplement — Theranostics. 2015 Jan 1;5(3):289–301. doi: 10.7150/thno.10155 (PMC4279192; doi:10.7150/thno.10155), 2015-01-01
Supplement: thnov05p0289s1.pdf [file thnov05p0289s1.pdf]

## SUPPLEMENTARY MATERIALS

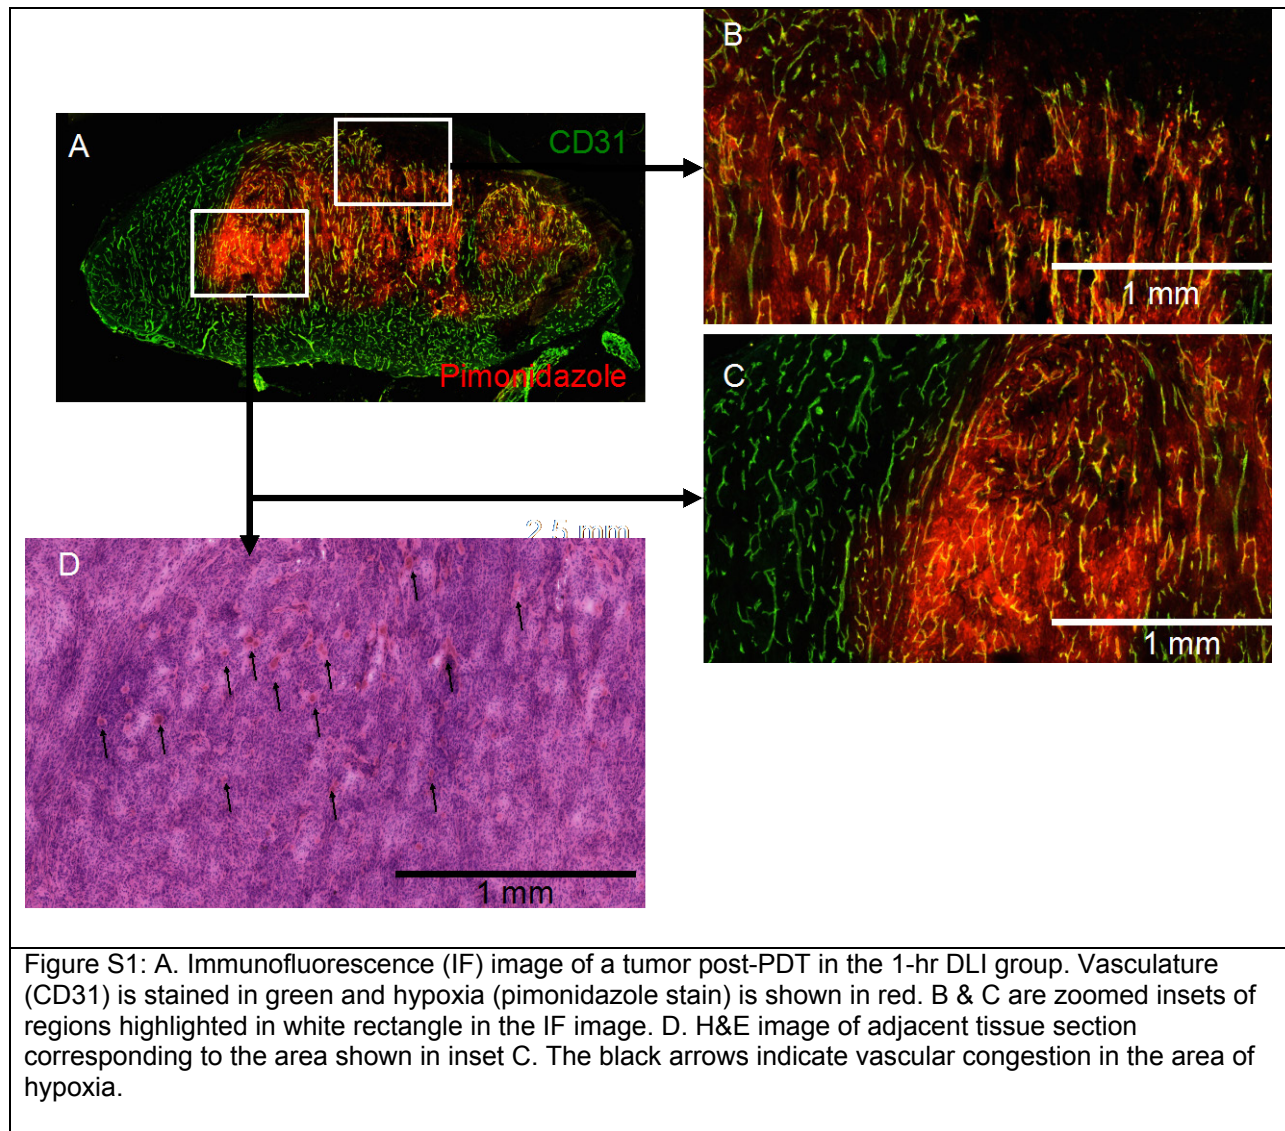

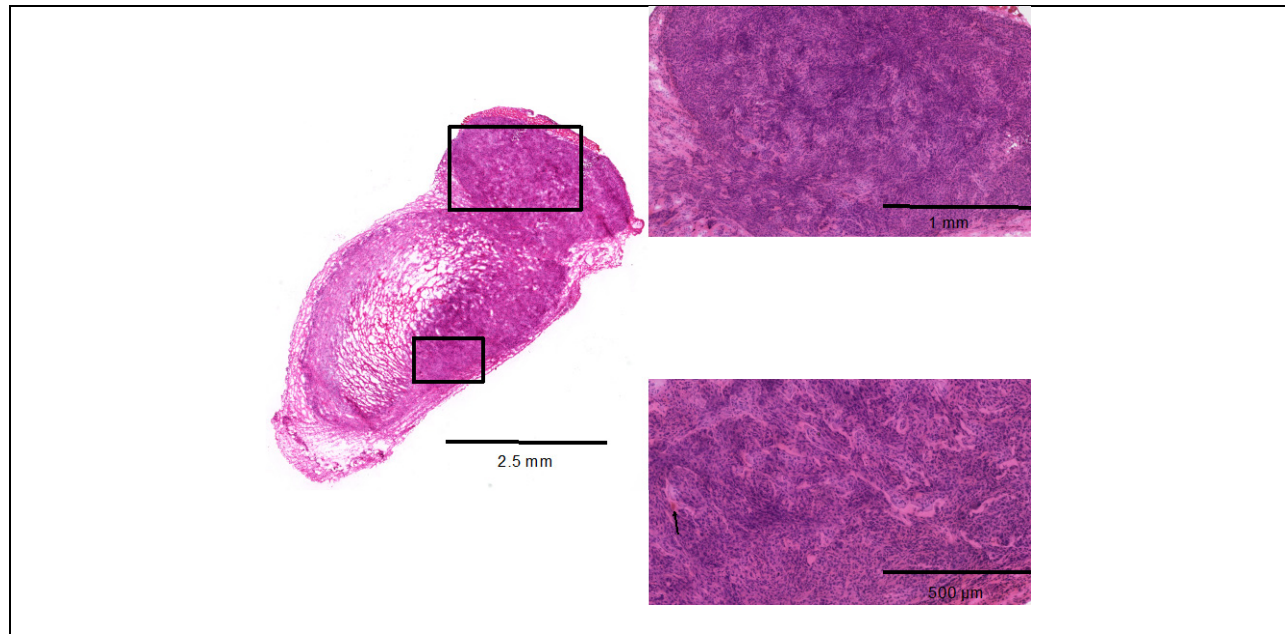

Figure S2: H&E image of a tumor in the 3-hr DLI group (from Fig. 4 bottom panel). Zoomed insets do not show significant vascular congestion. The zoomed regions are the areas with positive pimonidazole stain as shown in Fig. 4 bottom panel.

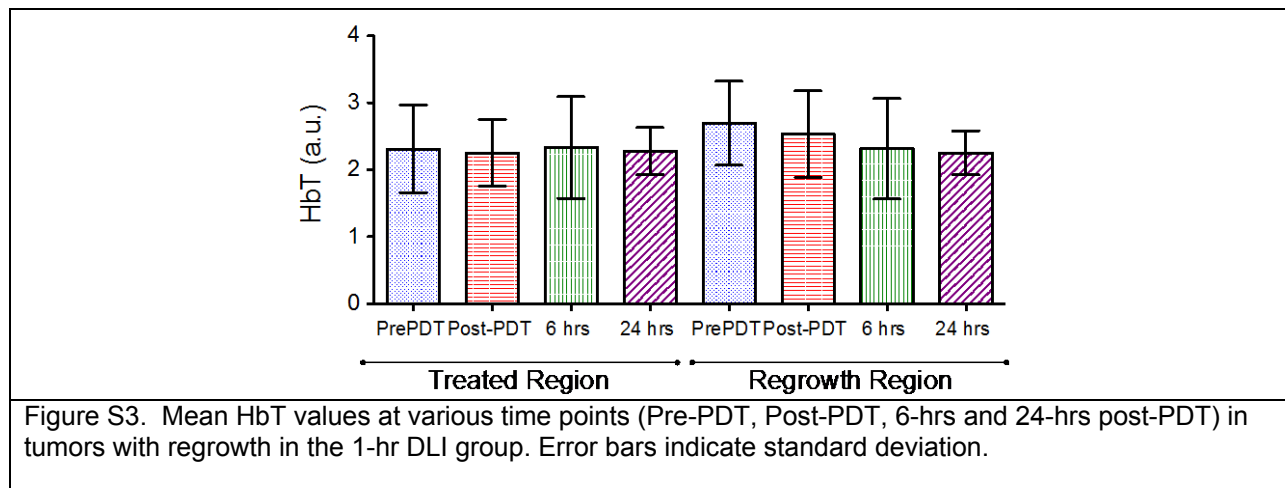

Figure S3. Mean HbT values at various time points (Pre-PDT, Post-PDT, 6-hrs and 24-hrs post-PDT) in tumors with regrowth in the 1-hr DLI group. Error bars indicate standard deviation.

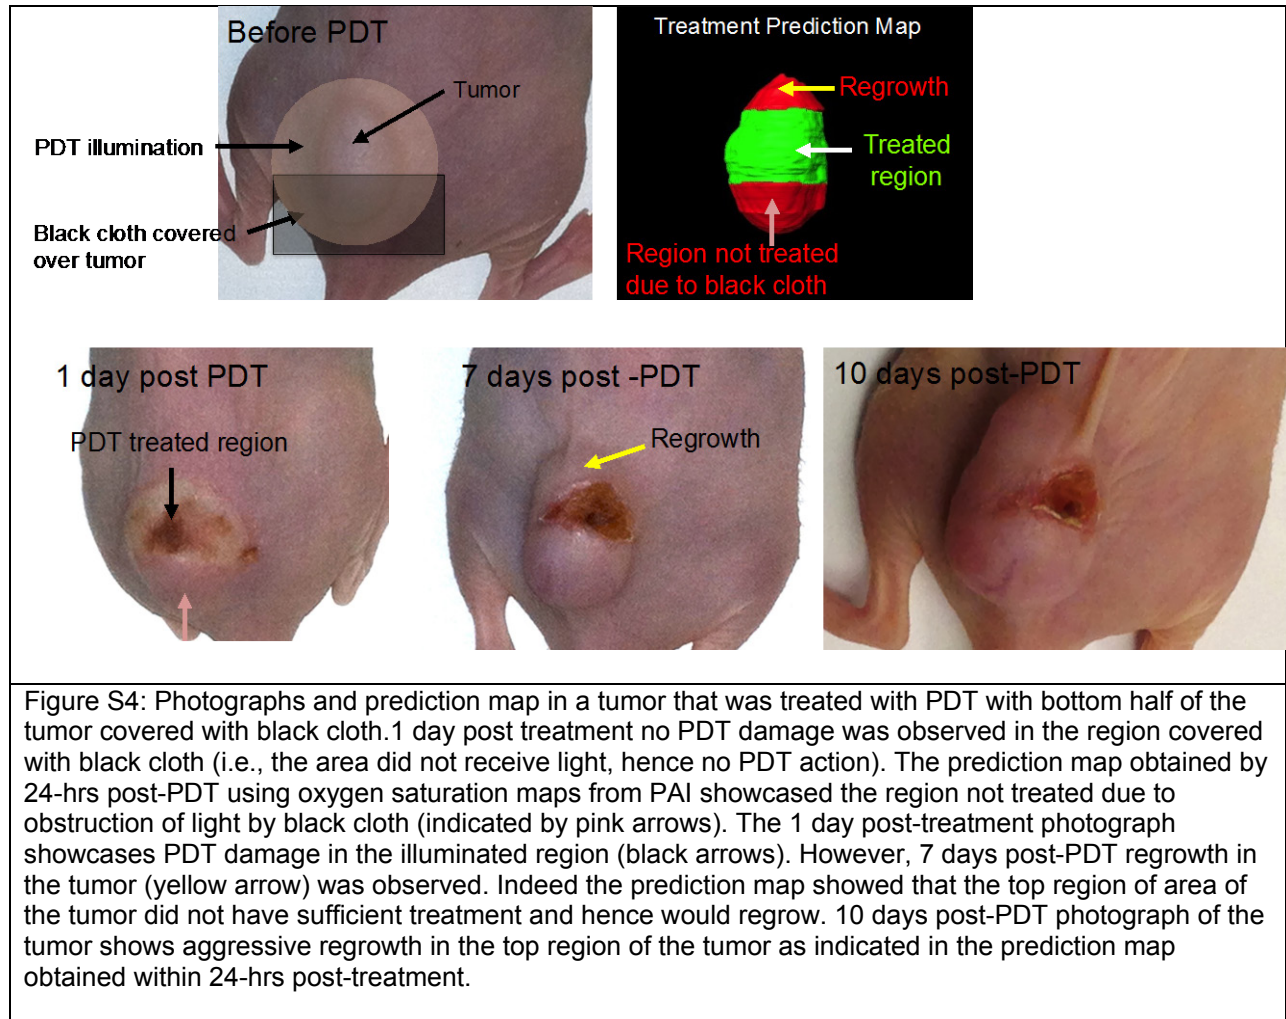

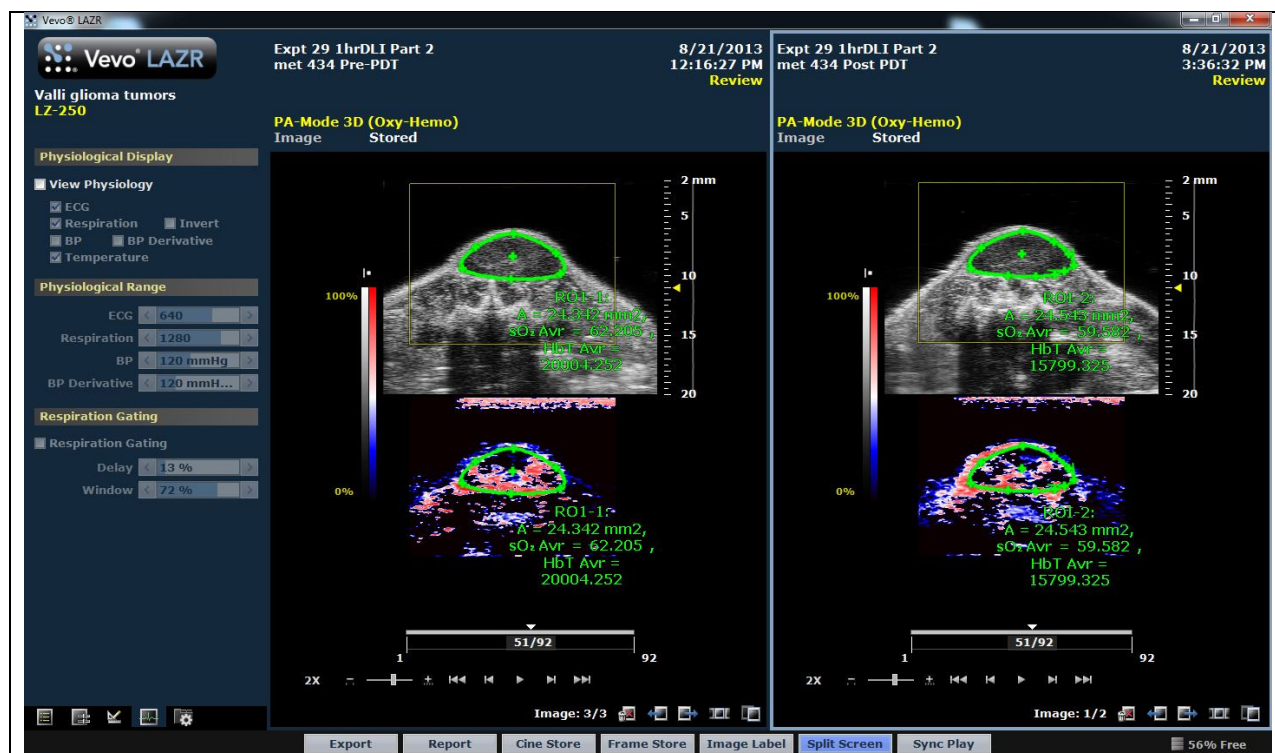

Figure S5: A screenshot of the split screen capability in the Vevo LAZR system software. The split screen feature enables real-time adjustment of the tumor location similar to that acquired prior to PDT.

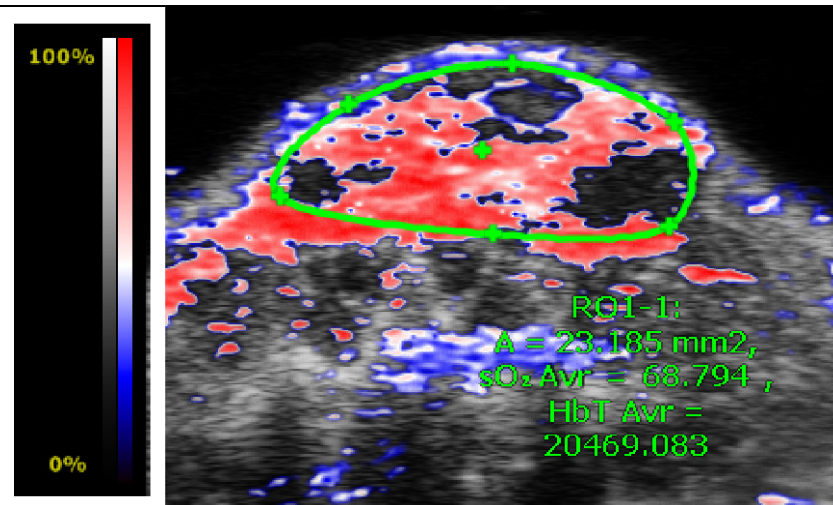

Figure S6: A representative screenshot of the ultrasound (grayscale) image overlaid with a  $StO_2$  image of the subcutaneous tumor. The  $StO_2$  image was pseudo-colored such that red represented oxygenated regions while blue represented hypoxic regions. The of the Vevo LAZR workstation software gave the area (A), average  $StO_2$  ( $sO_2 \text{ Avr}$ ) and HbT values ( $HbT \text{ Avr}$ ) in the region of interest (ROI is shown in green).

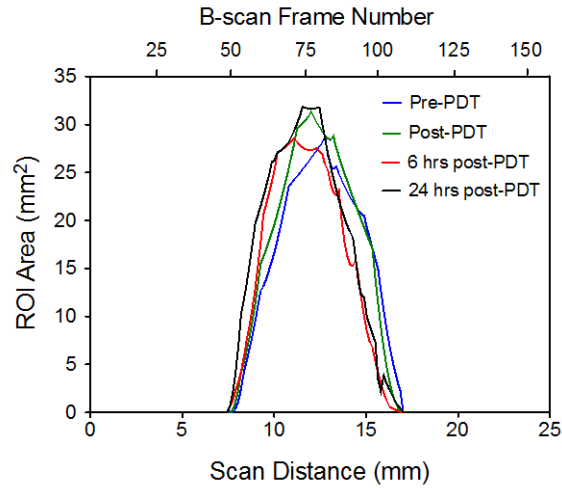

Figure S7. An example of the tumor ROI area as a function of 3D scan distance at different time points in the same mouse. As seen in Movie S2, the tumor ROI area has a normal distribution with increase in area as the scan moves towards the center of the tumor and decrease in area as the scan progress away from the tumor.

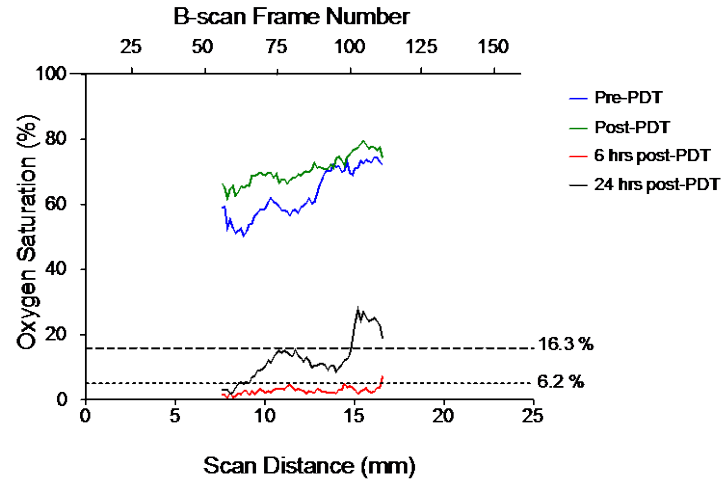

Figure S8: A representative  $\text{StO}_2$  graph as a function of scan distance for a tumor at different time points. A customized MATLAB routine is written to verify if the  $\text{StO}_2$  values at a particular B-scan frame is less than 6.2% and 16.3% at 6 hours and 24 hours post-PDT respectively. For a particular B-scan image (frame number), if the algorithm yielded a value of 1 (true case), the tumor ROI of that image is pseudo-colored green (representing treated region) in the 3D visualization software AMIRA else the ROI is pseudo-colored red (representing non-treated region).

## Supplementary Tables

**Table S1:** Comparison of StO<sub>2</sub> values from the 1-hr DLI (responders) and 3-hr DLI (non-responders) groups at various time points using one-way ANOVA Tukey's multiple comparison test

| Tukey's Multiple Comparison Test       | Difference in the mean | Significant? P < 0.001? |
|----------------------------------------|------------------------|-------------------------|
| Pre-PDT 3-hr DLI vs Pre-PDT 1-hr DLI   | 3.41                   | No                      |
| Post-PDT 3-hr DLI vs Post-PDT 1-hr DLI | -0.43                  | No                      |
|                                        |                        |                         |
| Pre-PDT 3-hr DLI vs Post-PDT 3-hr DLI  | -0.63                  | No                      |
| Pre-PDT 1-hr DLI vs Post-PDT 1-hr DLI  | -4.47                  | Yes                     |
|                                        |                        |                         |
| Pre-PDT 3-hr DLI vs 6-hrs 3-hr DLI     | 8.53                   | Yes                     |
| Pre-PDT 3-hr DLI vs 24-hrs 3-hr DLI    | 0.91                   | No                      |
| Pre-PDT 1-hr DLI vs 6-hrs 1-hr DLI     | 49.80                  | Yes                     |
| Pre-PDT 1-hr DLI vs 24-hrs 1-hr DLI    | 44.74                  | Yes                     |
|                                        |                        |                         |
| Post-PDT 3-hr DLI vs 6-hrs 3-hr DLI    | 9.17                   | Yes                     |
| Post-PDT 3-hr DLI vs 24-hrs 3-hr DLI   | 1.55                   | No                      |
| Post-PDT 1-hr DLI vs 6-hrs 1-hr DLI    | 54.27                  | Yes                     |
| Post-PDT 1-hr DLI vs 24-hrs 1-hr DLI   | 49.22                  | Yes                     |
|                                        |                        |                         |
| 6-hrs 3-hr DLI vs 6-hrs 1-hr DLI       | 44.67                  | Yes                     |
| 24-hrs 3-hr DLI vs 24-hrs 1-hr DLI     | 47.24                  | Yes                     |
|                                        |                        |                         |
| 6-hrs 3-hr DLI vs 24-hrs 3-hr DLI      | -7.62                  | Yes                     |
| 6-hrs 1-hr DLI vs 24-hrs 1-hr DLI      | -5.06                  | Yes                     |
|                                        |                        |                         |

**Table S2:** Comparison of HbT values from the 1-hr DLI (responders) and 3-hr DLI (non-responders) groups at various time points using one-way ANOVA Tukey's multiple comparison test

| Tukey's Multiple Comparison Test       | Mean Diff. | Significant? P < 0.001? |
|----------------------------------------|------------|-------------------------|
| Pre-PDT 3-hr DLI vs Pre-PDT 1-hr DLI   | -0.086     | No                      |
| Post-PDT 3-hr DLI vs Post-PDT 1-hr DLI | -0.17      | No                      |
|                                        |            |                         |
| Pre-PDT 3-hr DLI vs Post-PDT 3-hr DLI  | -0.038     | No                      |
| Pre-PDT 1-hr DLI vs Post-PDT 1-hr DLI  | 2.22       | No                      |
|                                        |            |                         |
| Pre-PDT 3-hr DLI vs 6-hrs 3-hr DLI     | 0.18       | No                      |
| Pre-PDT 3-hr DLI vs 24-hrs 3-hr DLI    | 0.22       | No                      |
| Pre-PDT 1-hr DLI vs 6-hrs 1-hr DLI     | -0.5838    | Yes                     |
| Pre-PDT 1-hr DLI vs 24-hrs 1-hr DLI    | 0.01       | No                      |
|                                        |            |                         |
| Post-PDT 3-hr DLI vs 6-hrs 3-hr DLI    | 0.22       | No                      |
| Post-PDT 3-hr DLI vs 24-hrs 3-hr DLI   | 0.25       | No                      |
| Post-PDT 1-hr DLI vs 6-hrs 1-hr DLI    | -0.80      | Yes                     |
| Post-PDT 1-hr DLI vs 24-hrs 1-hr DLI   | -0.21      | No                      |
|                                        |            |                         |
| 6-hrs 3-hr DLI vs 6-hrs 1-hr DLI       | -0.85      | Yes                     |
| 24-hrs 3-hr DLI vs 24-hrs 1-hr DLI     | -0.3       | No                      |
|                                        |            |                         |
| 6-hrs 3-hr DLI vs 24-hrs 3-hr DLI      | 0.03       | No                      |
| 6-hrs 1-hr DLI vs 24-hrs 1-hr DLI      | 0.59       | Yes                     |
|                                        |            |                         |

**TABLE S3:** Receiver-operating-curve analysis of the two parameters StO<sub>2</sub> at 6-hrs and StO<sub>2</sub> at 24-hrs

| Parameter                           | Area under curve | Standard Error | 95% Confidence Interval |
|-------------------------------------|------------------|----------------|-------------------------|
| StO <sub>2</sub> at 6-hrs post PDT  | 0.978            | 0.00530        | 0.967 to 0.988          |
| StO <sub>2</sub> at 24-hrs post PDT | 0.991            | 0.00344        | 0.984 to 0.998          |

**TABLE S4:** Pair wise comparison of ROC curves of the two parameters StO<sub>2</sub> at 6-hrs and StO<sub>2</sub> at 24-hrs

|                              |                    |
|------------------------------|--------------------|
| Difference between ROC areas | 0.0131             |
| Standard Error               | 0.00640            |
| 95% Confidence Interval      | 0.000575 to 0.0257 |
| Z statistic                  | 2.050              |
| Significance level           | P = 0.0404         |

**Table S5:** Comparison of HbT values from the treated regions and possible regrowth regions in the 1-hr DLI groups at various time points using one-way ANOVA Tukey's multiple comparison test.

| Tukey's Multiple Comparison Test                    | Difference in the mean | Significant? P < 0.001? |
|-----------------------------------------------------|------------------------|-------------------------|
| Pre-PDT treated region vs Pre-PDT regrowth region   | -0.38                  | No                      |
| Post-PDT treated region vs Post-PDT regrowth region | -0.27                  | No                      |
|                                                     |                        |                         |
| Pre-PDT treated region vs Post-PDT treated region   | 0.06                   | No                      |
| Pre-PDT regrowth region vs Post-PDT regrowth region | 0.16                   | No                      |
|                                                     |                        |                         |
| Pre-PDT treated region vs 6-hrs treated region      | -0.02                  | No                      |
| Pre-PDT treated region vs 24-hrs treated region     | 0.035                  | No                      |
| Pre-PDT regrowth region vs 6-hrs regrowth region    | 0.38                   | No                      |
| Pre-PDT regrowth region vs 24-hrs regrowth region   | 0.44                   | No                      |
|                                                     |                        |                         |
| Post-PDT treated region vs 6-hrs treated region     | -0.08                  | No                      |
| Post-PDT treated region vs 24-hrs treated region    | -0.02                  | No                      |
| Post-PDT regrowth region vs 6-hrs regrowth region   | 0.22                   | No                      |
| Post-PDT regrowth region vs 24-hrs regrowth region  | 0.27                   | No                      |
|                                                     |                        |                         |
| 6-hrs treated region vs 6-hrs regrowth region       | 0.017                  | No                      |
| 24-hrs treated region vs 24-hrs regrowth region     | 0.025                  | No                      |
|                                                     |                        |                         |
| 6-hrs treated region vs 24-hrs treated region       | 0.05                   | No                      |
| 6-hrs regrowth region vs 24-hrs regrowth region     | 0.06                   | No                      |
|                                                     |                        |                         |

**Table S6:** Physical characteristics of liposomes encapsulating BPD

| Concentration<br>( $\mu$ M) | Size (nm) | Zeta Potential<br>(mV) | Polydispersity<br>Index |
|-----------------------------|-----------|------------------------|-------------------------|
| 238.7                       | 134.16    | 15.26                  | 0.0744                  |

## Supplementary Movie Legend

**Movie S1.** Movie showing 3D scan of the tumor along the Y- axis (Blue color). The X- axis and Z- axis are shown in red and green color respectively. A 3D scan consists of several B-scan images of ultrasound images (grayscale) overlaid with StO<sub>2</sub> images. The StO<sub>2</sub> image was pseudocolored such that red represented oxygenated regions while blue represented hypoxic regions.

**Movie S2.** The movie shows the tumor ROI area at different frames on the 3D scan. The area of the ROI (A), average StO<sub>2</sub> and HbT values within the ROI (Fig. S6), are calculated using the OxyZated<sup>TM</sup> tool and the HemoMeaZure<sup>TM</sup> tool of the Oxy-Hemo feature of the Vevo LAZR software (VisualSonics, Canada).
